# Supplementary material for: A positive feed-forward loop between Fusobacteriumnucleatum and ethanol metabolism reprogramming drives laryngeal cancer progression and metastasis
Source: PubMed Central journal article supplement (PMC8851092; doi:10.1016/j.isci.2022.103829), 2022-01-30
Supplement: mmc1.pdf [file mmc1.pdf]

**Supplemental information**

**A positive feed-forward loop between *Fusobacterium  
nucleatum* and ethanol metabolism reprogramming  
drives laryngeal cancer progression and metastasis**

**Chi-Yao Hsueh, Qiang Huang, Hongli Gong, Yujie Shen, Ji Sun, Hui-Ching Lau, Duo Zhang, Di Tang, Chunping Wu, Yang Guo, Huiying Huang, Pengyu Cao, Lei Tao, Ming Zhang, and Liang Zhou**

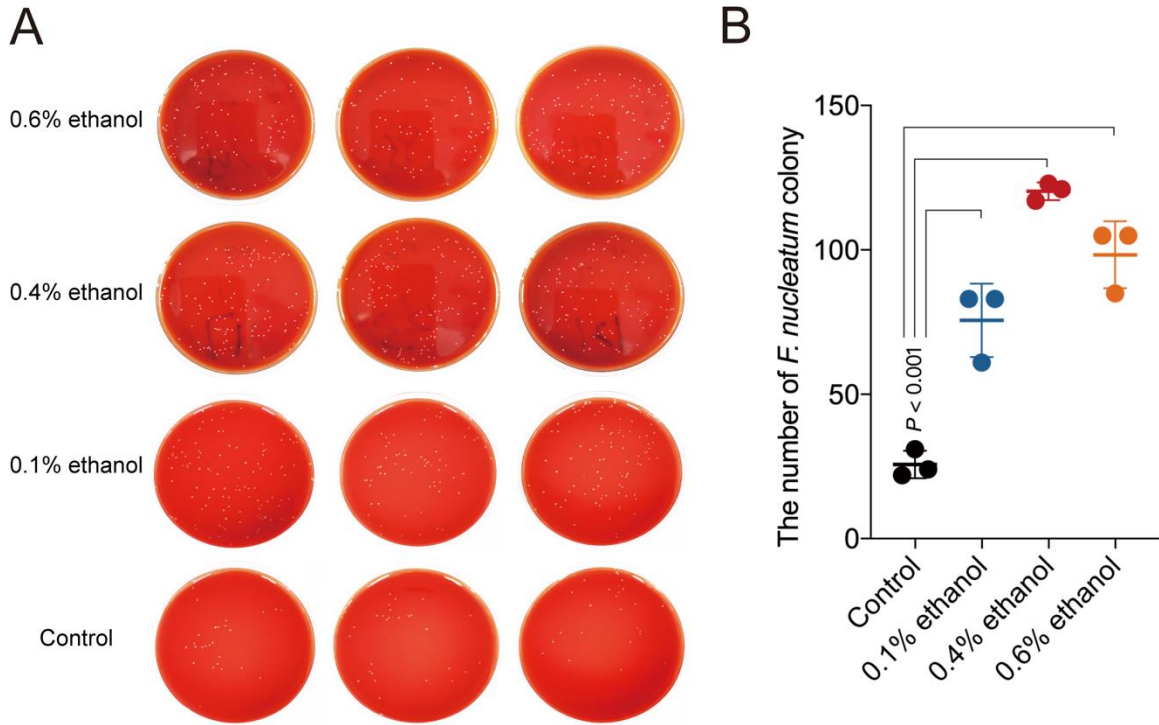

**Figure S1. Ethanol promotes *F. nucleatum* proliferation, related to Figure 2.**

(A) Representative data of *F. nucleatum* colony in 0.1%, 0.4% and 0.6% (v/v) ethanol by colony formation under different experimental conditions (n = 3 for each group).

(B) Statistical analysis of the number of *F. nucleatum* colony to different experimental conditions (n = 3 for each group) as assessed by the ordinary two-way ANOVA. Data are represented as mean ± SD.

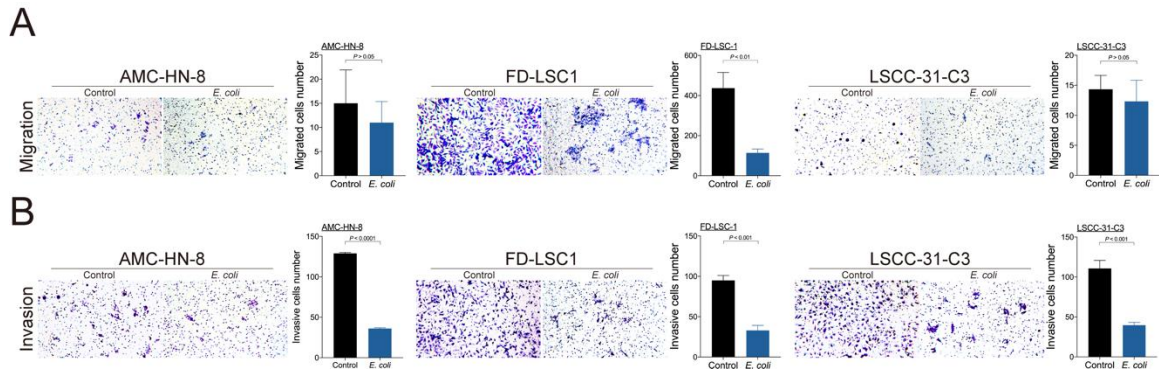

**Figure S2. *E. coli* does not promote cell migration and invasion in LSCC, related to Figure 2.**

(A) Transwell migration assays were performed in 3 LSCC cell lines cultured in the presence or absence of *E. coli* strain *DH5a* as calculated with the Student's unpaired t test.

(B) Transwell invasion assays were performed in 3 LSCC cell lines cultured in the presence or absence of *E. coli* strain *DH5a* as calculated with the Student's unpaired t test. Data are represented as mean  $\pm$  SD.

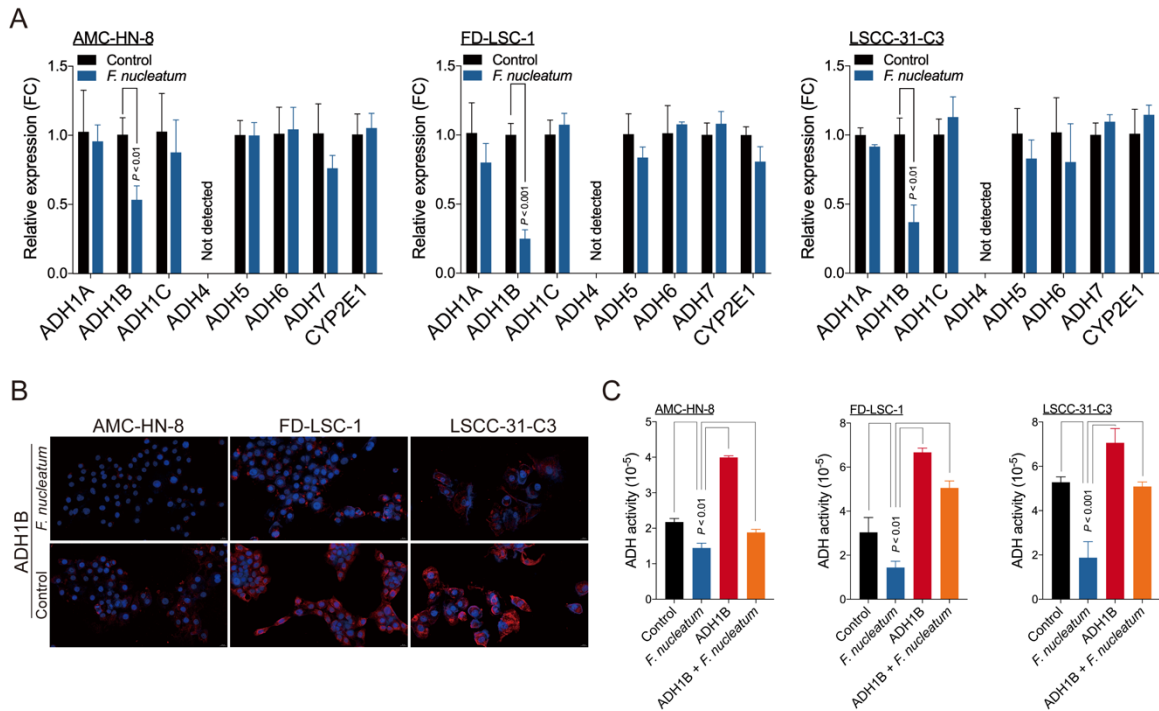

**Figure S3. *F. nucleatum* inhibits ADH1B expression, related to Figure 2.**

(A) Statistical analysis of the relative expression of 7 members of ADH family and CYP2E1 in 3 LSCC cell lines cultured in the presence or absence of *F. nucleatum* as assessed by Students unpaired t-test.

(B) Representative immunofluorescence was showed (40 × magnification) on ADH1B expression in 3 LSCC cell lines in the presence or absence of *F. nucleatum*. Bar scale, 20 μm.

(C) The ADH enzymatic activity was measured by ELISA assay in 3 LSCC cell lines with or without ADH1B-overexpressing lentiviral vector transduction and subsequently cultured with *F. nucleatum* as assessed by the ordinary one-way ANOVA. Data are represented as mean ± SD.

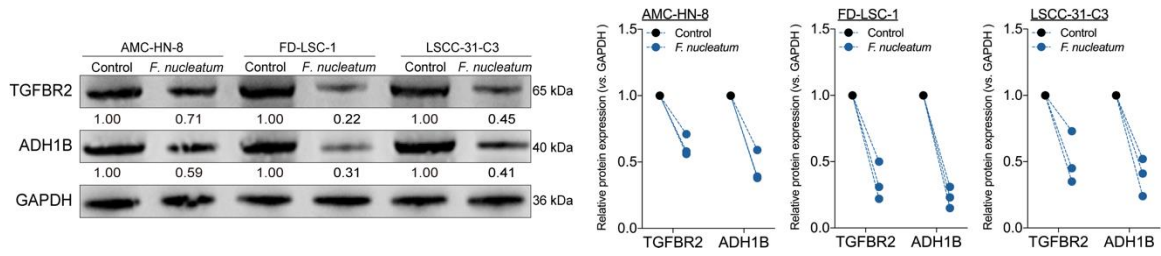

**Figure S4. *F. nucleatum* inhibits ADH1B and TGFBR2 expression, related to Figure 2, 3.**

Western blotting was performed to assess ADH1B and TGFBR2 expression in 3 LSCC cell lines cultured with *F. nucleatum*.

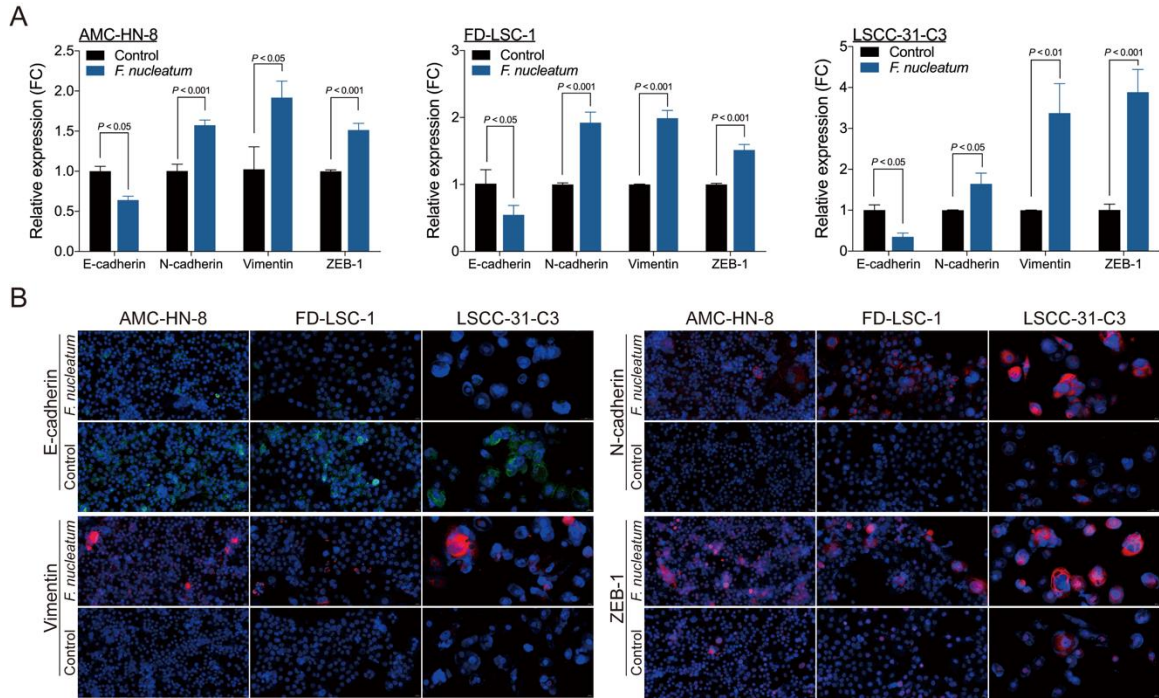

**Figure S5. *F. nucleatum* promotes EMT in LSCC, related to Figure 3.**

(A) Statistical analysis of the relative expression of EMT-related genes (E-cadherin, N-cadherin, Vimentin, and ZEB-1) in 3 LSCC cell lines cultured in the presence or absence of *F. nucleatum* as assessed by Students unpaired t-test.

(B) Representative immunofluorescence was showed (40 × magnification) on E-cadherin, N-cadherin, Vimentin, and ZEB-1 expression in 3 LSCC cell lines in the presence or absence of *F. nucleatum*. Bar scale, 20 μm. Data are represented as mean ± SD.

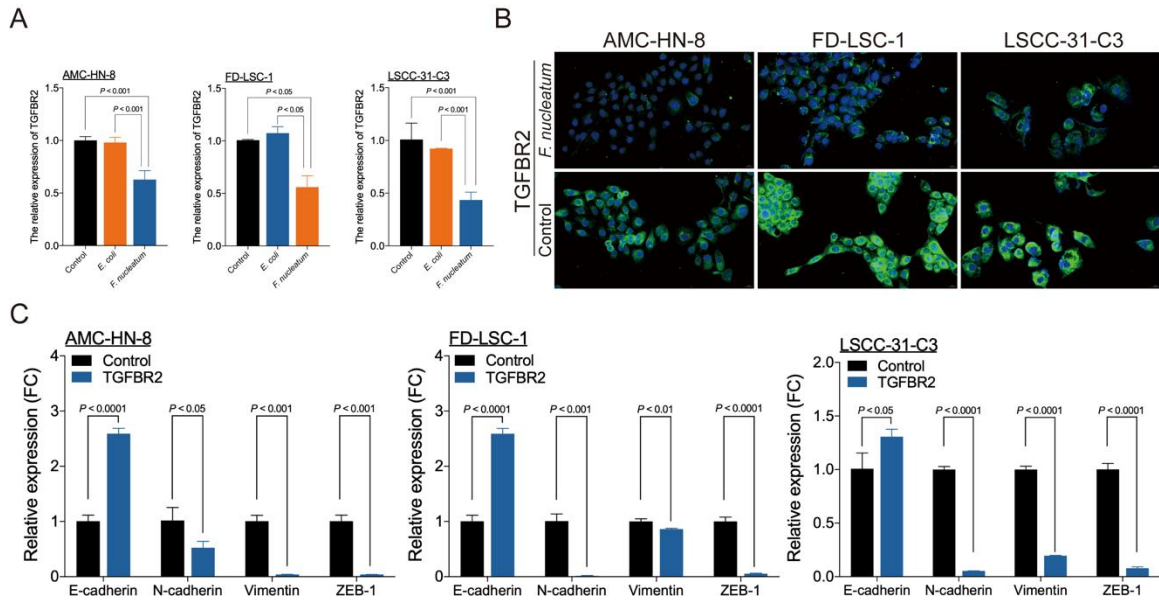

**Figure S6. *F. nucleatum*-induced EMT in LSCC by suppressing TGFB2 expression, related to Figure 3.**

(A) Statistical analysis of the relative expression of TGFB2 in 3 LSCC cell lines cultured with *F. nucleatum* or *E. coli* as calculated with Students unpaired t-test.

(B) Representative immunofluorescence was showed (40 × magnification) on TGFB2 expression in 3 LSCC cell lines in the presence or absence of *F. nucleatum*. Bar scale, 20 μm.

(C) Statistical analysis of the relative expression of EMT-related genes (E-cadherin, N-cadherin, Vimentin, and ZEB-1) in 3 LSCC cell lines with or without TGFB2 overexpressed lentiviral vector transduction as calculated with Students unpaired t-test. Data are represented as mean ± SD.

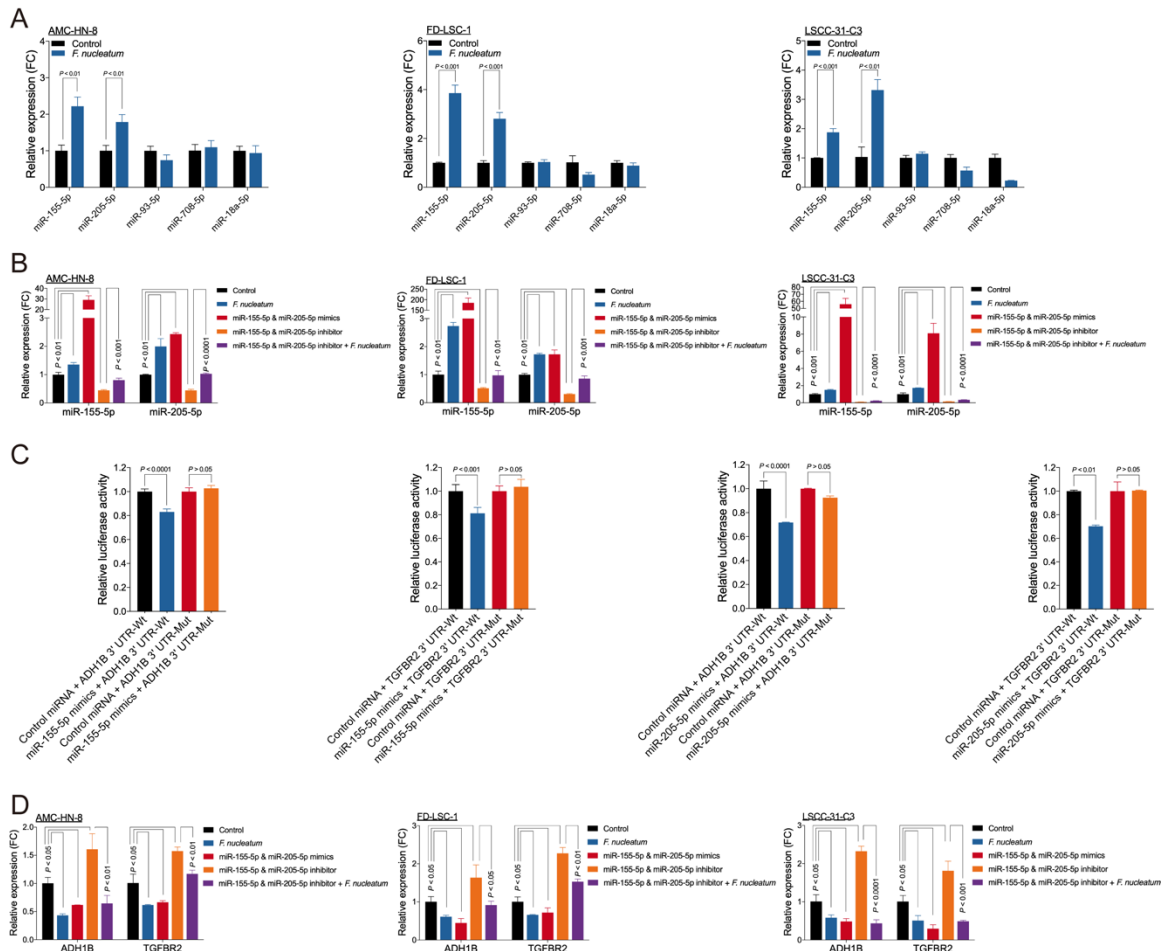

**Figure S7. *F. nucleatum* inhibits ADH1B and TGFBR2 expression by increasing miR-155-5p and miR-205-5p, related to Figure 4.**

(A) Statistical analysis of the relative expression of LSCC-related miRNAs in 3 LSCC cell lines transfected with miR-155-5p and miR-205-5p mimics or inhibitor and cultured in the presence or absence of *F. nucleatum* as calculated with Students unpaired t-test.

(B) Statistical analysis of the relative expression of miR-155-5p and miR-205-5p in 3 LSCC cell lines transfected with miR-155-5p and miR-205-5p mimics or inhibitor and cultured in the presence or absence of *F. nucleatum* as calculated with Students unpaired t-test.

(C) Dual-luciferase activity was measured in HEK293T cell line cultured treated with miR-155-5p & miR-205-5p mimics or control miRNA. Dual-luciferase reporters expressing wild-type (Wt) or mutant (Mut) 3'UTRs from human ADH1B and TGFBR2 mRNA were used.



The dual-luciferase activity was normalized based on the control miRNA transfection as assessed by the ordinary one-way ANOVA.

(D) Statistical analysis of the relative expression of ADH1B and TGFBR2 in 3 LSCC cell lines transfected with miR-155-5p and miR-205-5p mimics or inhibitor and cultured in the presence or absence of *F. nucleatum* as calculated with Students unpaired t-test. Data are represented as mean  $\pm$  SD.

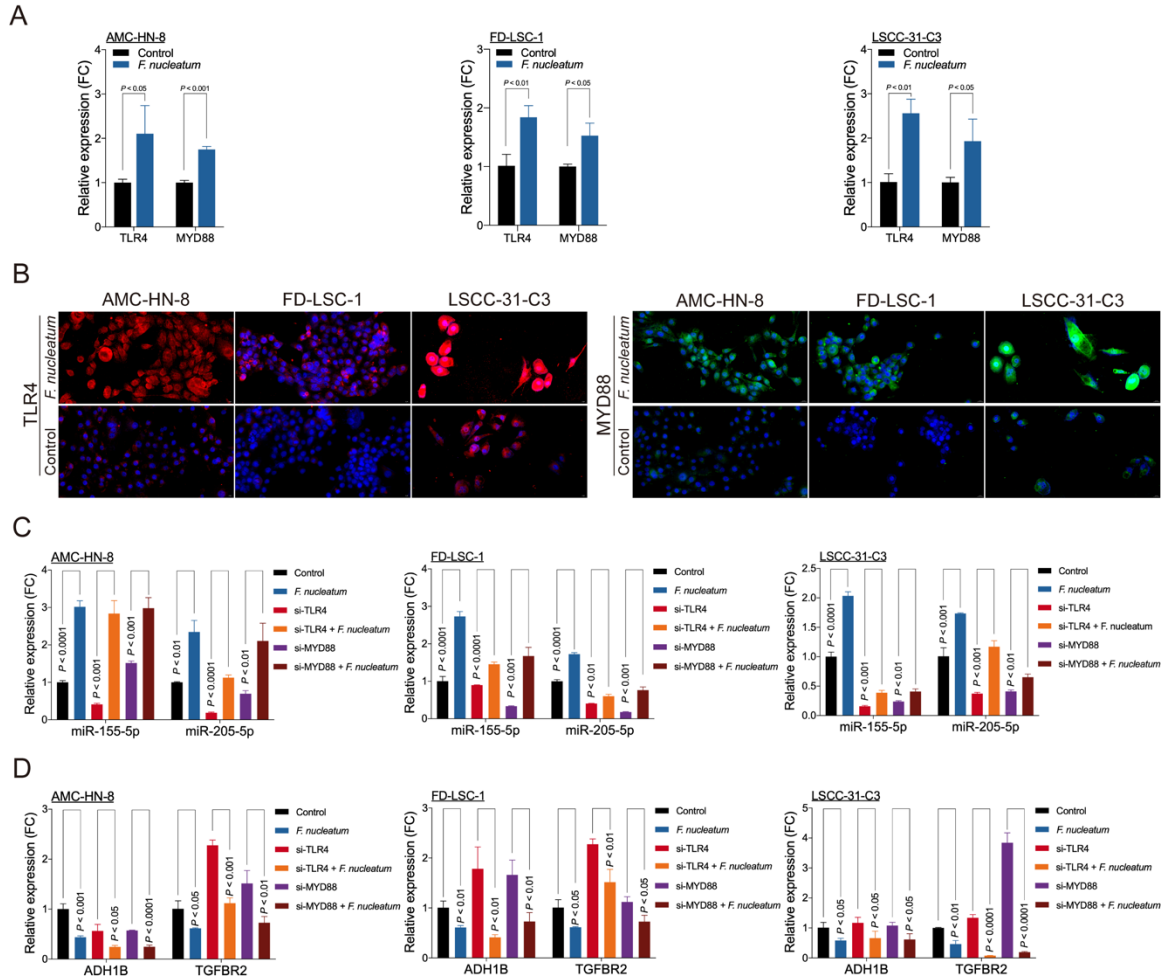

**Figure S8. TLR4 and MYD88 are involved in *F. nucleatum*-mediated ADH1B and TGFBR2 expression, related to Figure 4.**

(A) Statistical analysis of the relative expression of TLR4 and MYD88 in 3 LSCC cell lines cultured in the presence or absence of *F. nucleatum* as assessed by Students unpaired t-test.

(B) Representative immunofluorescence was showed (40 x magnification) on TLR4 and MYD88 expression in 3 LSCC cell lines in the presence or absence of *F. nucleatum*. Bar scale, 20  $\mu$ m.

(C) Statistical analysis of the relative expression of miR-155-5p and miR-205-5p in 3 LSCC cell lines transfected with TLR4 and MYD88 siRNAs and cultured in the presence or absence of *F. nucleatum* as calculated with Students unpaired t-test.

(D) Statistical analysis of the relative expression of ADH1B and TGFBR2 in 3 LSCC cell lines transfected with TLR4 and MYD88 siRNAs and cultured in the presence or absence of *F. nucleatum* as calculated with Students unpaired t-test. Data are represented as mean  $\pm$  SD.

**Table S1. The Correlation of *F. nucleatum* content (-ΔCt) and clinicopathologic factors in Cohort 1, related to Figure 1.**

| Characteristics         | Total, n  | <i>F. nucleatum</i> amount (-ΔCt) | <i>P</i>      |
|-------------------------|-----------|-----------------------------------|---------------|
|                         |           | (mean ± SD)                       |               |
| Age, years              |           |                                   | 0.1430        |
| ≥ 60                    | 95        | -7.7938 ± 4.8223                  |               |
| < 60                    | 36        | -9.0972 ± 4.3039                  |               |
| Sex                     |           |                                   | 0.8450        |
| Male                    | 128       | -8.1428 ± 4.7559                  |               |
| Female                  | 3         | -8.5411 ± 1.6662                  |               |
| Smoking history         |           |                                   | 0.4429        |
| Yes                     | 120       | -8.2583 ± 4.6641                  |               |
| No                      | 11        | -6.9917 ± 5.2320                  |               |
| <b>Drinking history</b> |           |                                   | <b>0.0421</b> |
| <b>Yes</b>              | <b>79</b> | <b>-7.3842 ± 5.1911</b>           |               |
| <b>No</b>               | <b>52</b> | <b>-9.3183 ± 3.5956</b>           |               |
| Hypertension            |           |                                   | 0.3141        |
| Yes                     | 37        | -7.5016 ± 5.3059                  |               |
| No                      | 94        | -8.4078 ± 4.4520                  |               |
| Diabetes                |           |                                   | 0.8050        |
| Yes                     | 15        | -8.6199 ± 5.3399                  |               |
| No                      | 116       | -8.0914 ± 4.6398                  |               |
| Tumor subsite           |           |                                   | 0.6989        |
| Supraglottic            | 52        | -8.1244 ± 4.2122                  |               |
| Glottic & Subglottic    | 79        | -8.1701 ± 5.0302                  |               |
| <b>pT stage</b>         |           |                                   | <b>0.0029</b> |

|                              |           |                         |               |
|------------------------------|-----------|-------------------------|---------------|
| <b>T1 - T2</b>               | <b>54</b> | <b>-9.4000 ± 5.4448</b> |               |
| <b>T3 - T4</b>               | <b>77</b> | <b>-7.2767 ± 3.9141</b> |               |
| pN stage                     |           |                         | 0.3283        |
| N0                           | 90        | -8.4682 ± 4.7903        |               |
| N+                           | 41        | -7.4577 ± 4.4933        |               |
| <b>pTNM stage*</b>           |           |                         | <b>0.0167</b> |
| <b>I - II</b>                | <b>41</b> | <b>-9.7544 ± 5.0619</b> |               |
| <b>III - IV</b>              | <b>90</b> | <b>-7.4220 ± 4.3711</b> |               |
| Pathological differentiation |           |                         | 0.1051        |
| Moderate & Poor              | 91        | -8.5776 ± 4.8884        |               |
| Well                         | 40        | -7.1835 ± 4.1569        |               |
| <b>Tumor diameter</b>        |           |                         | <b>0.0168</b> |
| <b>&gt; 3cm</b>              | <b>58</b> | <b>-7.0433 ± 4.4707</b> |               |
| <b>≤ 3cm</b>                 | <b>73</b> | <b>-9.0328 ± 4.7308</b> |               |

---

\*According to the 8th American Joint Committee on cancer (AJCC) stage system.

**Table S2. Multiple linear regression method with *F. nucleatum* content ( $-\Delta Ct$ ) as the dependent variable, related to Figure 1.**

| Linear regression     | <i>B</i>      | <i>P</i> value     | 95% CI                 |
|-----------------------|---------------|--------------------|------------------------|
| <b>Drinking index</b> | <b>0.4053</b> | <b>&lt; 0.0001</b> | <b>0.0004 - 0.0009</b> |
| <b>pTNM stage*</b>    | <b>0.2752</b> | <b>0.0011</b>      | <b>0.5662 - 2.2058</b> |
| Age                   | 0.1093        | 0.1859             | -0.0320 - 0.1631       |
| Hypertension          | 0.0285        | 0.7291             | -1.398 - 1.9926        |
| Smoking index         | -0.0166       | 0.8374             | -0.0009 - 0.0007       |
| Sex                   | -0.0126       | 0.8795             | -5.3130 - 4.5556       |
| Diabetes              | 0.0103        | 0.9003             | -2.2428 - 2.5466       |

Drinking index: the average gram of alcohol intaked per day x years spent drinking; Smoking index: the number of cigarettes smoked per day x years spent smoking. \*According to the 8th American Joint Committee on cancer (AJCC) stage system.

**Table S3. The correlation of *F. nucleatum* content (- $\Delta$ Ct) and clinicopathologic factors in Cohort 2, related to Figure 1.**

| Characteristics         | Total, n  | <i>F. nucleatum</i> amount (- $\Delta$ Ct) |                    | P             |
|-------------------------|-----------|--------------------------------------------|--------------------|---------------|
|                         |           | Low, n, %                                  | High, n, %         |               |
| All cases, n            | 40        | 20 (50.00%)                                | 20 (50.00%)        |               |
| Age, years              |           |                                            |                    | 0.3332        |
| ≥ 60                    | 24        | 14 (70.00%)                                | 10 (50.00%)        |               |
| < 60                    | 16        | 6 (30.00%)                                 | 10 (50.00%)        |               |
| Smoking history         |           |                                            |                    | > 0.9999      |
| Yes                     | 27        | 13 (65.00%)                                | 14 (70.00%)        |               |
| No                      | 13        | 7 (35.00%)                                 | 6 (30.00%)         |               |
| <b>Drinking history</b> |           |                                            |                    | <b>0.0225</b> |
| <b>Yes</b>              | <b>23</b> | <b>8 (40.00%)</b>                          | <b>16 (80.00%)</b> |               |
| <b>No</b>               | <b>17</b> | <b>12 (60.00%)</b>                         | <b>4 (20.00%)</b>  |               |
| Hypertension            |           |                                            |                    | > 0.9999      |
| Yes                     | 15        | 8 (40.00%)                                 | 7 (35.00%)         |               |
| No                      | 25        | 12 (60.00%)                                | 13 (65.00%)        |               |
| Diabetes                |           |                                            |                    | 0.4872        |
| Yes                     | 2         | 2 (10.00%)                                 | 0 (0.00%)          |               |
| No                      | 38        | 18 (90.00%)                                | 20 (100.00%)       |               |
| Tumor subsite           |           |                                            |                    | > 0.9999      |
| Supraglottic            | 16        | 8 (40.00%)                                 | 8 (40.00%)         |               |
| Glottic                 | 24        | 12 (60.00%)                                | 12 (60.00%)        |               |
| pT stage                |           |                                            |                    | 0.7512        |
| T1 - T2                 | 18        | 10 (50.00%)                                | 8 (40.00%)         |               |
| T3 - T4                 | 22        | 10 (50.00%)                                | 12 (60.00%)        |               |

|                              |    |                    |                    |  |               |
|------------------------------|----|--------------------|--------------------|--|---------------|
| pN stage                     |    |                    |                    |  | > 0.9999      |
| N0                           | 23 | 11 (55.00%)        | 12 (60.00%)        |  |               |
| N+                           | 17 | 9 (45.00%)         | 8 (40.00%)         |  |               |
| pTNM stage*                  |    |                    |                    |  | 0.4801        |
| I - II                       | 11 | 7 (35.00%)         | 4 (20.00%)         |  |               |
| III - IV                     | 29 | 13 (65.00%)        | 16 (80.00%)        |  |               |
| Pathological differentiation |    |                    |                    |  | > 0.9999      |
| Well                         | 6  | 3 (15.00%)         | 3 (15.00%)         |  |               |
| Moderate                     | 34 | 17 (85.00%)        | 17 (85.00%)        |  |               |
| Tumor diameter               |    |                    |                    |  | > 0.9999      |
| > 3cm                        | 13 | 7 (35.00%)         | 6 (30.00%)         |  |               |
| ≤ 3cm                        | 27 | 13 (65.00%)        | 14 (70.00%)        |  |               |
| Recurrence                   |    |                    |                    |  | <b>0.0011</b> |
| Yes                          | 17 | <b>3 (15.00%)</b>  | <b>14 (70.00%)</b> |  |               |
| No                           | 23 | <b>17 (85.00%)</b> | <b>6 (30.00%)</b>  |  |               |
| Cancer-specific death        |    |                    |                    |  |               |
| Yes                          | 11 | <b>2 (10.00%)</b>  | <b>9 (45.00%)</b>  |  | <b>0.0310</b> |
| No                           | 29 | <b>18 (90.00%)</b> | <b>11 (55.00%)</b> |  |               |

---

\*According to the 8th American Joint Committee on cancer (AJCC) stage system.



**Table S4. The correlation of *F. nucleatum* content (-ΔCt) and clinicopathologic factors in Cohort 3, related to Figure 6.**

| Characteristics         | Total, n  | <i>F. nucleatum</i> amount (-ΔCt) |                    | P             |
|-------------------------|-----------|-----------------------------------|--------------------|---------------|
|                         |           | Low, n, %                         | High, n, %         |               |
| All cases, n            | 74        | 41 (55.41%)                       | 33 (44.59%)        |               |
| Age, years              |           |                                   |                    | 0.2436        |
| ≥ 60                    | 41        | 20 (48.78%)                       | 21 (63.64%)        |               |
| < 60                    | 33        | 21 (51.22%)                       | 12 (36.36%)        |               |
| Sex                     |           |                                   |                    | 0.5826        |
| Male                    | 71        | 40 (97.56%)                       | 31 (93.94%)        |               |
| Female                  | 3         | 1 (2.44%)                         | 2 (6.06%)          |               |
| Smoking history         |           |                                   |                    | 0.6301        |
| Yes                     | 46        | 24 (58.54%)                       | 22 (66.67%)        |               |
| No                      | 28        | 17 (41.46%)                       | 11 (33.33%)        |               |
| <b>Drinking history</b> |           |                                   |                    | <b>0.0182</b> |
| <b>Yes</b>              | <b>42</b> | <b>18 (43.90%)</b>                | <b>24 (72.73%)</b> |               |
| <b>No</b>               | <b>32</b> | <b>23 (56.10%)</b>                | <b>9 (27.27%)</b>  |               |
| Hypertension            |           |                                   |                    | 0.6301        |
| Yes                     | 28        | 17 (41.46%)                       | 11 (33.33%)        |               |
| No                      | 46        | 24 (58.43)                        | 22 (66.67%)        |               |
| Diabetes                |           |                                   |                    | 0.7439        |
| Yes                     | 10        | 5 (12.20%)                        | 5 (15.15%)         |               |
| No                      | 64        | 36 (87.80%)                       | 28 (84.85%)        |               |
| Tumor subsite           |           |                                   |                    | 0.6194        |
| Supraglottic            | 24        | 12 (29.27%)                       | 12 (36.36%)        |               |
| Glottic                 | 50        | 29 (70.73%)                       | 21 (63.64%)        |               |

|                              |    |             |             |               |
|------------------------------|----|-------------|-------------|---------------|
| <b>pT stage</b>              |    |             |             | <b>0.0187</b> |
| T1 - T2                      | 37 | 26 (63.41%) | 11 (33.33%) |               |
| T3 - T4                      | 37 | 15 (36.59%) | 22 (66.67%) |               |
| pN stage                     |    |             |             | 0.5635        |
| N0                           | 59 | 34 (82.93%) | 25 (75.76%) |               |
| N+                           | 15 | 7 (17.07%)  | 8 (24.24%)  |               |
| <b>pTNM stage*</b>           |    |             |             | <b>0.0182</b> |
| I - II                       | 32 | 23 (56.10%) | 9 (27.27%)  |               |
| III - IV                     | 42 | 18 (43.90%) | 24 (72.73%) |               |
| Pathological differentiation |    |             |             | 0.7989        |
| Well                         | 21 | 11 (26.83%) | 10 (30.30%) |               |
| Moderate & Poor              | 53 | 30 (73.17%) | 23 (69.70%) |               |
| Tumor diameter               |    |             |             | 0.4597        |
| > 3cm                        | 25 | 12 (29.27%) | 13 (39.39%) |               |
| ≤ 3cm                        | 49 | 29 (70.73%) | 20 (60.61%) |               |
| <b>Recurrence</b>            |    |             |             | <b>0.0009</b> |
| Yes                          | 33 | 11 (26.83%) | 22 (66.67%) |               |
| No                           | 41 | 30 (73.17%) | 11 (33.33%) |               |
| <b>Cancer-specific death</b> |    |             |             | <b>0.0255</b> |
| Yes                          | 25 | 9 (21.95%)  | 16 (48.48%) |               |
| No                           | 49 | 32 (78.05%) | 17 (51.52%) |               |

---

\*According to the 8th American Joint Committee on cancer (AJCC) stage system.

**Table S5. Primer sequences used for qRT-PCR and FISH, related to STAR Methods.**

| Preimers            | Forward primer (5' to 3')         | Reverse primer (5' to 3')             | Propose |
|---------------------|-----------------------------------|---------------------------------------|---------|
| <i>F. nucleatum</i> | CAACCATTACTTTAACTC<br>TACCATGTTCA | GTTGACTTTACAGAAGGAGAT<br>TATGTAAAAATC | qPCR    |
| FUS664              | CTTGTAGTT<br>CCGC(C/T)TACCTC      | N/A                                   | FISH    |
| EUB338              | GCTGCCTCCCGTAGGAG<br>T            | N/A                                   | FISH    |
| has-miR-155-<br>5p  | AACCCCTATCACGATTAG<br>CATTAA      | N/A                                   | FISH    |
| has-miR-205-<br>5p  | CAGACTCCGGTGGAATG<br>AAGGA        | N/A                                   | FISH    |
| has-miR-155-<br>5p  | CGCTTAATGCTAATCGTG<br>ATAGGGGTT   | N/A                                   | qPCR    |
| has-miR-205-<br>5p  | TCCTTCATTCCACCGGAG<br>TCT         | N/A                                   | qPCR    |
| PGT                 | ATCCCCAAAGCACCTGG<br>TTT          | AGAGGCCAAGATAGTCCTGGT<br>AA           | qPCR    |
| U6                  | GTGCTCGCTTCGGCAGC<br>ACAT         | N/A                                   | qPCR    |
| GAPDH               | TGTAGTTGAGGTCAATGA<br>AGGG        | ACATCGCTCAGACACCATG                   | qPCR    |
| TGFBR2              | GTAGCTCTGATGAGTGC<br>AATGAC       | CAGATATGGCAACTCCCAGTG                 | qPCR    |
| TLR4                | GGATGAGGACTGGGTAA<br>GGAATGA      | AGCGGCTCTGGATGAAGTGC                  | qPCR    |

|            |                             |                               |      |
|------------|-----------------------------|-------------------------------|------|
| MYD88      | GCCGCCGGATGGTGGTG<br>GTTGT  | TTGGTGCAGGGGTTGGTGTA<br>GTCG  | qPCR |
| E-cadherin | ATTTTTCCCTCGACACCC<br>GAT   | TCCCAGGCGTAGACCAAGA           | qPCR |
| N-cadherin | TGCGGTACAGTGTA<br>GGG       | GAAACCGGGCTATCTGCTCG          | qPCR |
| Vimentin   | AGTCCACTGAGTACCGG<br>AGAC   | CATTCACGCATCTGGCGTTC          | qPCR |
| ZEB-1      | GATGATGAATGCGAGTC<br>AGATGC | ACAGCAGTGTCTTGTTGTTGT         | qPCR |
| ADH1A      | AGTCATCCCCTCGCTAT<br>TCC    | GTCCCCTGAGGATTGCTTACA         | qPCR |
| ADH1B      | GCTGGGGAATTGAAGCC<br>AACA   | CAGCATGTGTATGTTTCAGGGC<br>AAG | qPCR |
| ADH1C      | TGCTACTGACTGGACGC<br>ACG    | CAGCCACAAGTTTGGGGACA<br>GAT   | qPCR |
| ADH4       | AGTTCGCATTCAGATCAT<br>TGCT  | CTGGCCCAATACTTTCCACAA         | qPCR |
| ADH5       | ATGGCGAACGAGGTTAT<br>CAAG   | CATGTCCCAAGATCACTGGAA<br>AA   | qPCR |
| ADH6       | ACAGGCCAAGTCATCAG<br>ATGC   | CCACAACCTTTATGCGAACTT<br>CC   | qPCR |
| ADH7       | ACATGAGGCAACTGGGA<br>TTGT   | CATTGCATTCTCTACATTGTG<br>GC   | qPCR |
| CYP2E1     | GTGATGCACGGCTACAA<br>GG     | GGGTGGTCAGGGAAAACCG           | qPCR |
